# Supplementary material for: Probiotics and Antibiotic-Induced Microbial Aberrations in Children: A Secondary Analysis of a Randomized Clinical Trial
Source: PubMed Central journal article supplement (PMC11227081; doi:10.1001/jamanetworkopen.2024.18129), 2024-07-05
Supplement: jamanetwopen-e2418129-s004.pdf [file jamanetwopen-e2418129-s004.pdf]

## Supplemental Online Content: Nonauthor Collaborators

\*First name, last name, and suffix (if applicable) are required and will appear in PubMed.

| <b>*Group Name(s): Multispecies Probiotic in AAD Study Group</b> |                   |                              |                         |                    |                                                 |                                                                                                              |                                                                                                   |
|------------------------------------------------------------------|-------------------|------------------------------|-------------------------|--------------------|-------------------------------------------------|--------------------------------------------------------------------------------------------------------------|---------------------------------------------------------------------------------------------------|
| <b>*First Name and Middle Initial(s)</b>                         | <b>*Last Name</b> | <b>*Suffix (eg, Jr, III)</b> | <b>Academic Degrees</b> | <b>Institution</b> | <b>Location (city, state/province, country)</b> | <b>Role or Contribution, eg, chair, principal investigator</b>                                               | <b>Group (if more than 1 Group listed in the byline) and/or Subgroup (eg, Steering Committee)</b> |
| Sophie R. D.                                                     | van der Schoor    |                              | MD, PhD                 | OLVG Hospital      | Amsterdam, Noord-Holland, The Netherlands       | Helped with recruitment of participant in the OLVG hospital                                                  |                                                                                                   |
| Malika                                                           | Chegary           |                              | MD, PhD                 | OLVG Hospital      | Amsterdam, Noord-Holland, The Netherlands       | Helped with recruitment of participant in the OLVG hospital                                                  |                                                                                                   |
| Catharina (Karen) J.M.                                           | Koning            |                              | PhD                     | Winlove Probiotics | Amsterdam, Noord-Holland, The Netherlands       | Contributed in design and setup of the study, as well as on co-reading/giving input on the final manuscript. |                                                                                                   |
| Mark                                                             | Hanemaaijer       |                              | PhD                     | Winlove Probiotics | Amsterdam, Noord-Holland, The Netherlands       | Contributed in design and setup of the study, as well as on co reading/giving input on the final manuscript. |                                                                                                   |
