# Supplementary material for: Probiotics and Antibiotic-Induced Microbial Aberrations in Children: A Secondary Analysis of a Randomized Clinical Trial
Source: PubMed Central journal article supplement (PMC11227081; doi:10.1001/jamanetworkopen.2024.18129), 2024-07-05
Supplement: jamanetwopen-e2418129-s005.pdf [file jamanetwopen-e2418129-s005.pdf]

## Data Sharing Statement

Dierikx. Probiotics and Antibiotic-Associated Diarrhea in Children. *JAMA Netw Open*.  
Published June 27, 2024. doi:10.1001/jamanetworkopen.2024.18129

### Data

**Data available:** Yes

**Data types:** Deidentified participant data

**How to access data:** The data collected in the course of this study are available from the corresponding author upon reasonable request

**When available:** With publication

### Supporting Documents

**Document types:** None

### Additional Information

**Who can access the data:** The data collected in the course of this study are available from the corresponding author upon reasonable request

**Types of analyses:** Relevant to the study and working field focussing on impact of probiotics and/or antibiotics on the microbiome

**Mechanisms of data availability:** The data collected in the course of this study are available from the corresponding author upon reasonable request after approval of a proposal
